# Supplementary material
Source: ML conference proceedings conference paper supplement (https://openaccess.thecvf.com/content/cvpr_2017/html/de_Vries_GuessWhat_Visual_Object_2017_CVPR_paper.html)
Supplement: Supplementary file 1 [file de_Vries_GuessWhat_Visual_Object_2017_CVPR_supplemental.pdf]

## A. User interface

Figure 8, 9 presents the instructions for the oracle and questioner before they started their first game.

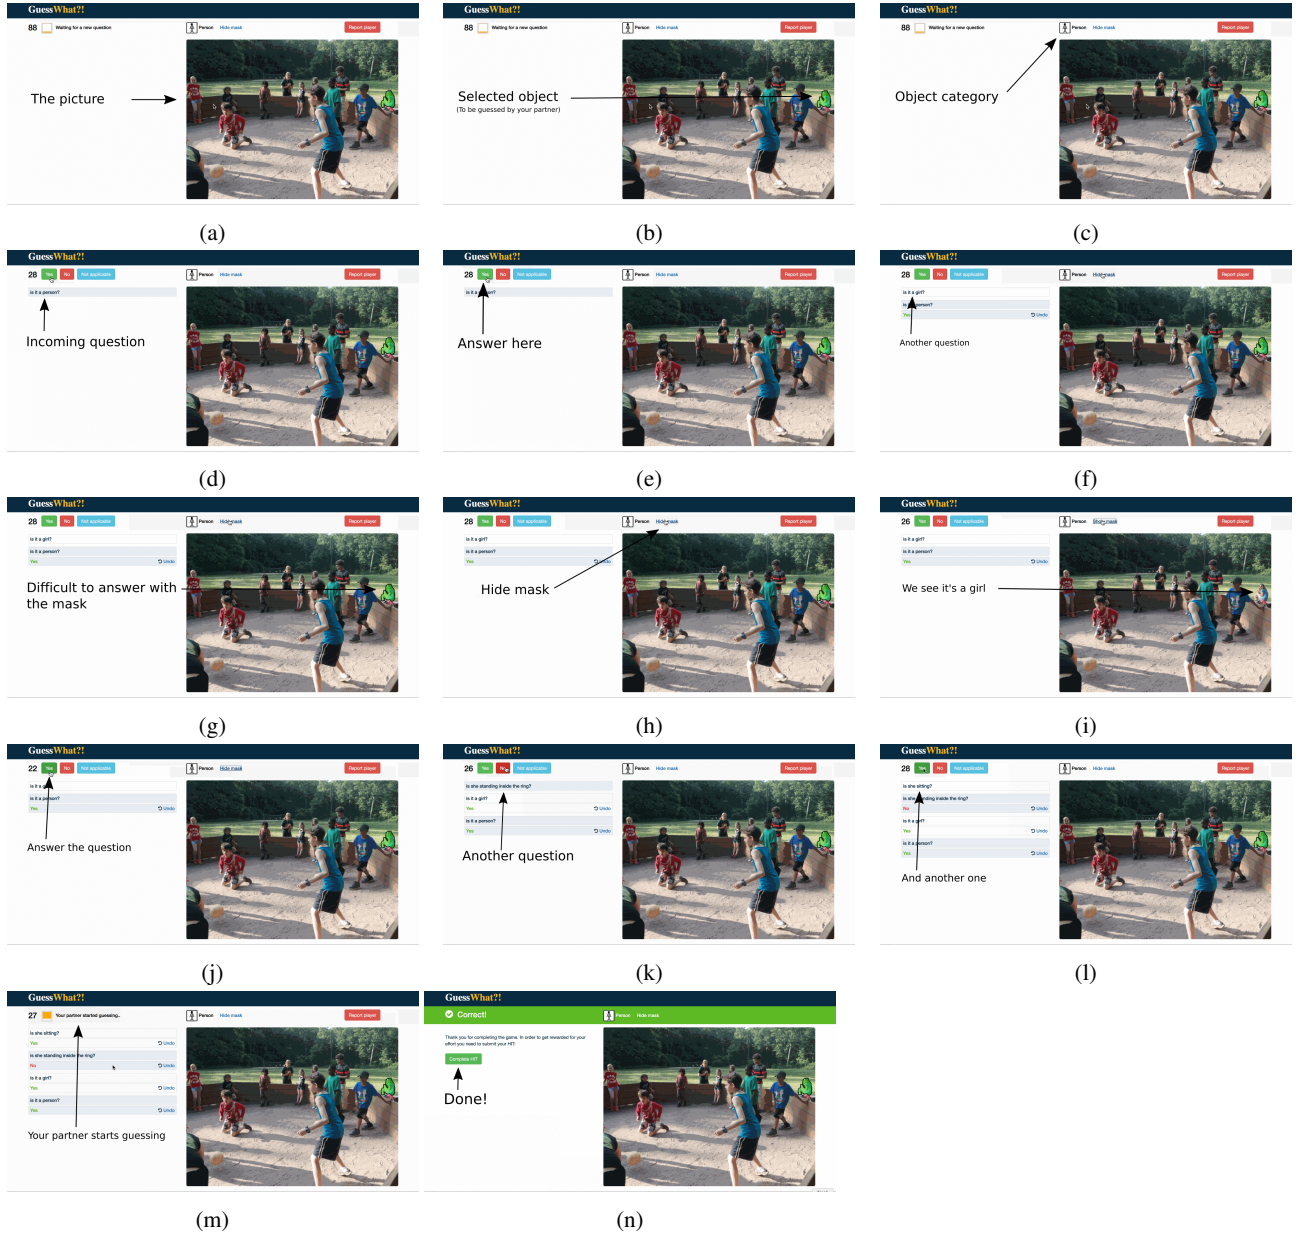

Figure 8: An example game from the perspective of the oracle. Shown from left to right and top to bottom.

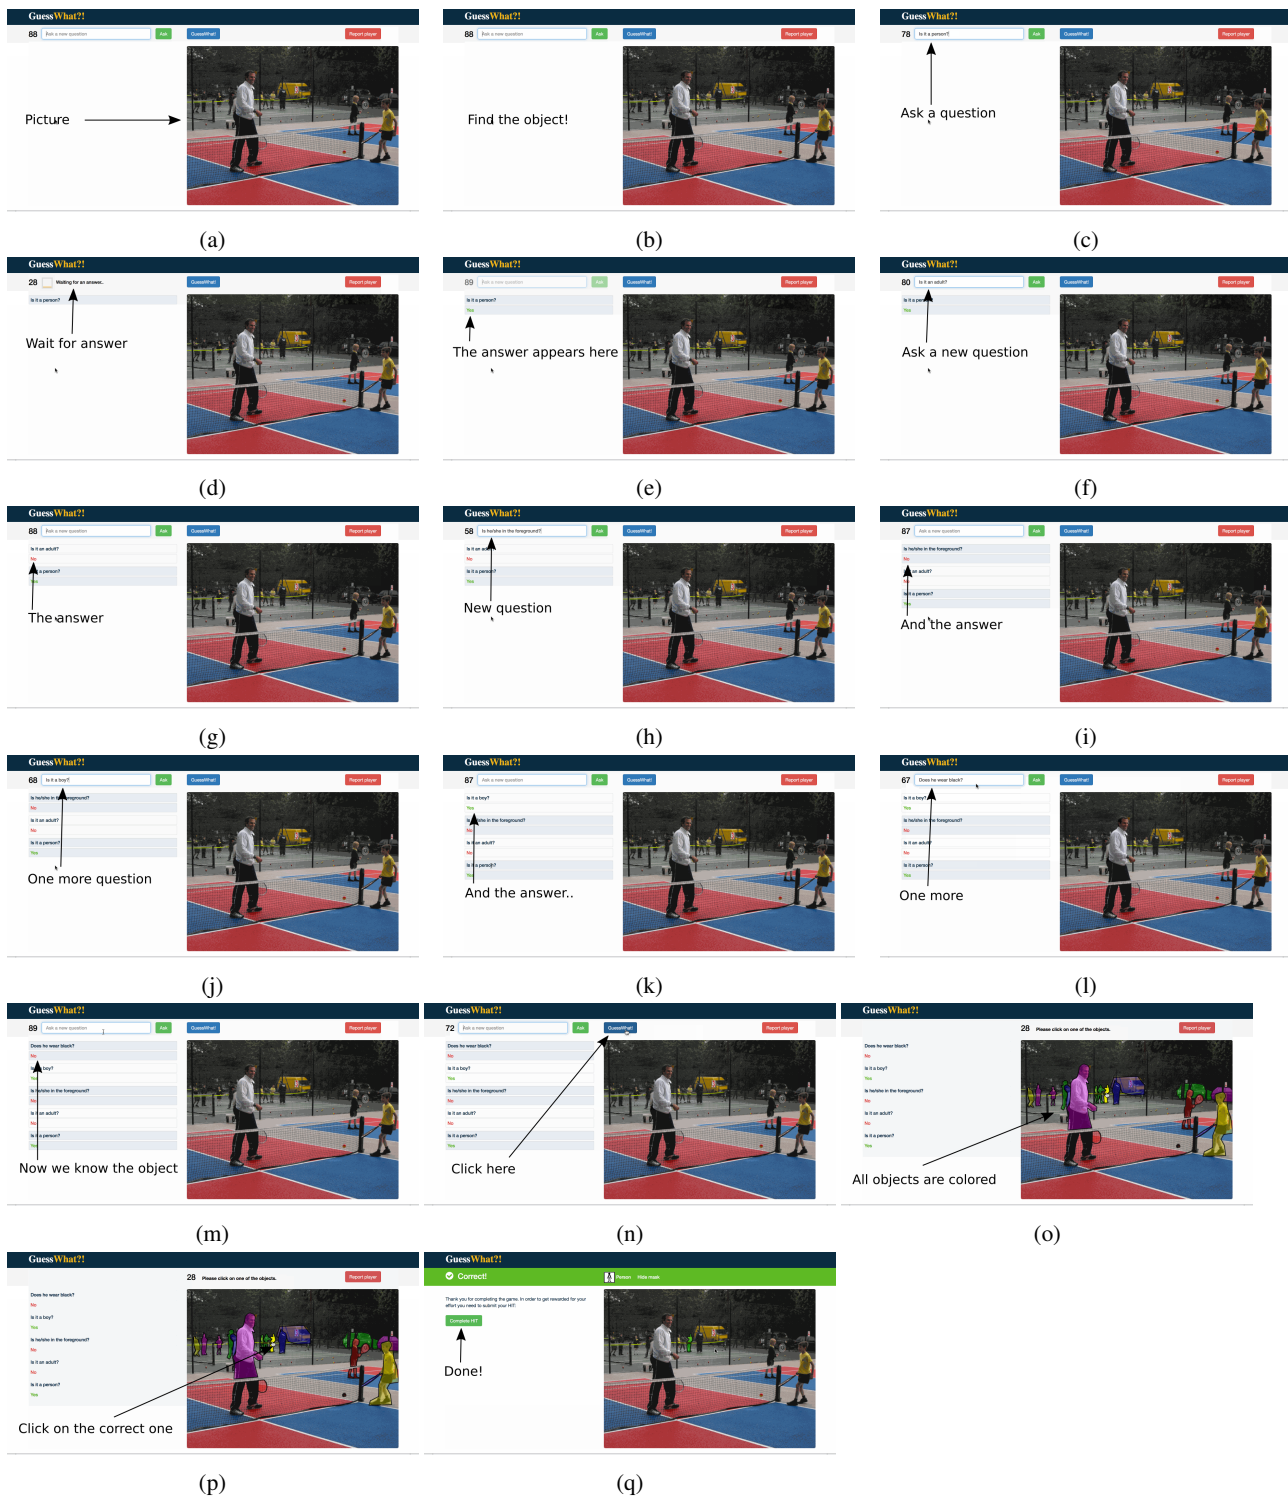

Figure 9: An example game from the perspective of the questioner. Shown from left to right and top to bottom.

## GuessWhat?!

### Instructions

You have to be a native english speaker in order to participate in this HIT.

Your task is to reformulate the following 25 questions which probably contain some spelling or grammar mistakes. The questions are extracted from the GuessWhat!? game in which a player locates an object in a picture by asking yes/no questions. For some questions more context is necessary to correct them, clicking on the 'show dialogue' button will show the game which the question was part of.

Two example corrections:

- ba na na? -> Is it a banana?
- in left of pic the far 2... one of them -> Is it one of the far two in the left of the picture?

Also make sure you retain the meaning of the question. Note further that a questions must:

- contain at least three words
- end with a question tag (?)

Your correction will be colored:

- In **red** if it does not follow the above constraints
- In **orange** if no correction has been made (in some cases this is fine)
- In **green** if it has been modified

Some displayed questions may have been corrected by other workers. If the displayed question makes no sense, you may display the original question by hovering it or displaying the full dialogue.

For any further questions regarding the HIT, please contact Harm de Vries at guesswhat.mturk@gmail.com.

| Questions                                                                           | Your correction      | More context                          |
|-------------------------------------------------------------------------------------|----------------------|---------------------------------------|
| a vehicle >                                                                         | <input type="text"/> | <a href="#">Display dialogue &gt;</a> |
| is it in firstbox                                                                   | <input type="text"/> | <a href="#">Display dialogue &gt;</a> |
| Do you see more than 3 clear pastic bottles on the top of the table?                | <input type="text"/> | <a href="#">Display dialogue &gt;</a> |
| the chapati .                                                                       | <input type="text"/> | <a href="#">Display dialogue &gt;</a> |
| 2nd \ \                                                                             | <input type="text"/> | <a href="#">Display dialogue &gt;</a> |
| ia it on the left                                                                   | <input type="text"/> | <a href="#">Display dialogue &gt;</a> |
| ok I see something completely yellow (not orange). Is this thing next to the yellow | <input type="text"/> | <a href="#">Display dialogue &gt;</a> |

(a) Interface to fix ill-formatted questions

## GuessWhat?!

### Instructions

You have to be a native english speaker in order to participate in this HIT.

Your task is to check whether the following 50 questions were correctly reformulate. The questions are extracted from the GuessWhat!? game in which a player locates an object in a picture by asking yes/no questions. For some questions more context is necessary to correct them, clicking on the 'show dialogue' button will show the game which the question was part of.

You have to select

- **Yes** if the reformulation preserve the initial meaning of the question AND there is no english mistakes
- **No** when the reformulation lower the initial meaning of the question OR if the reformulation contains english mistakes
- **Report** if the original/final question make no-sense regarding the dialogue OR the final question contains slang words

Two example corrections:

- ba na na? -> Is it a banana? **Yes**
- in left of pic the far 2... one of them -> Is it one of the far two in the left of the picture? **Yes**
- Is it the man is the wite T-shirt? -> Is it a man? **No**
- Is it 1 of these f\*\*\* eggs? -> Is it one of these f\*\*\*\*\* eggs? **Report**
- Is it 1 of the f\*\*\* eggs? -> Is it one of the eggs? **Yes**

For any further questions regarding the HIT, please contact Harm de Vries at guesswhat.mturk@gmail.com.

| Questions                                                               | Correction                                     | Diff                                                                                                        | Yes                   | No                    | Report                |                                       |
|-------------------------------------------------------------------------|------------------------------------------------|-------------------------------------------------------------------------------------------------------------|-----------------------|-----------------------|-----------------------|---------------------------------------|
| Is it the car behind the bus (you can see all of it)                    | Is the car behind the bus?                     | Is it the car behind the bus (you can see all of it)?                                                       | <input type="radio"/> | <input type="radio"/> | <input type="radio"/> | <a href="#">Display dialogue &gt;</a> |
| cp . . .                                                                | Is it the cap?                                 | ep . . . Is it the cap?                                                                                     | <input type="radio"/> | <input type="radio"/> | <input type="radio"/> | <a href="#">Display dialogue &gt;</a> |
| the whole (half) of a piece                                             | Is it the whole or half of a piece?            | Is it the whole (or half) of a piece?                                                                       | <input type="radio"/> | <input type="radio"/> | <input type="radio"/> | <a href="#">Display dialogue &gt;</a> |
| is it located at the left part of the pic>                              | Is it located at the left part of the picture? | Is it located at the left part of the pic>ture?                                                             | <input type="radio"/> | <input type="radio"/> | <input type="radio"/> | <a href="#">Display dialogue &gt;</a> |
| is he wear white t-shirt?                                               | Is he wearing a white t-shirt?                 | Is he wearing a white t-shirt?                                                                              | <input type="radio"/> | <input type="radio"/> | <input type="radio"/> | <a href="#">Display dialogue &gt;</a> |
| It is the person in white that we can only see their shudlers and head? | Is it the top half of a person wearing white?  | It is the person in white that we can only see their shudlers and head? top half of a person wearing white? | <input type="radio"/> | <input type="radio"/> | <input type="radio"/> | <a href="#">Display dialogue &gt;</a> |
| is it a doughnut?                                                       | Is it a doughnut?                              | Is it a doughnut?                                                                                           | <input type="radio"/> | <input type="radio"/> | <input type="radio"/> | <a href="#">Display dialogue &gt;</a> |
| is it skatebard?                                                        | Is it a skateboard?                            | Is it a skateboard?                                                                                         | <input type="radio"/> | <input type="radio"/> | <input type="radio"/> | <a href="#">Display dialogue &gt;</a> |

(b) Interface to validate the fix ill-formatted questions

Figure 10: In the first task, we ask workers to correct mistakes in the questions. We then ask workers to validate the proposed correction by showing the difference between the original question and its correction. We alternate both tasks till all questions are corrected and validated.

## B. GuessWhat?! samples

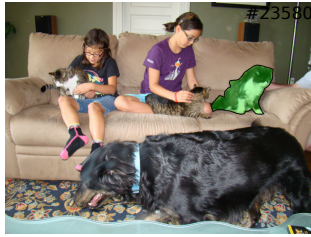

Is it a person? **No**  
 Is it a cat? **Yes**  
 Is it in the hands of these girls? **No**  
 The cat in the right side of the image? **Yes**

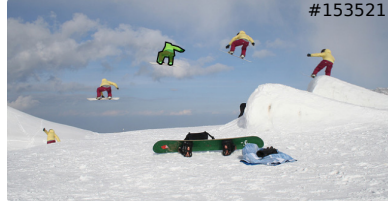

Is it human? **Yes**  
 Are they five humans visible? **Yes**  
 Is it leftmost? **No**  
 Is it in the middle? **Yes**  
 Is it the third one from the left? **Yes**

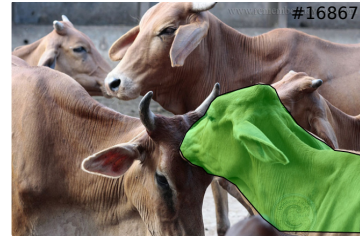

Is it an ear? **No**  
 Is it a horn? **No**  
 Is it a cow? **Yes**  
 Is it the one at the back? **No**  
 Does it have a horn? **Yes**

Figure 11: Three other examples of our dataset.

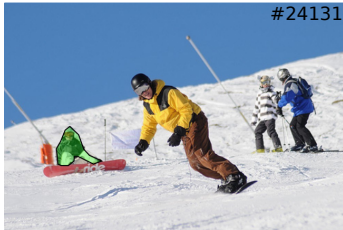

Is it a person? **Yes**  
 Is it in the foreground? **No**  
 Is he wearing blue shirt? **No**  
 Is he wearing black shirt? **Yes**

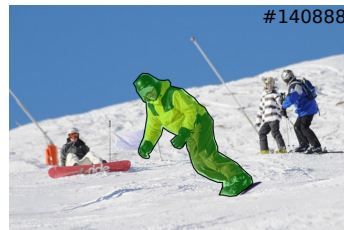

Is it a person? **Yes**  
 Is it standing? **Yes**  
 Is it in yellow? **Yes**

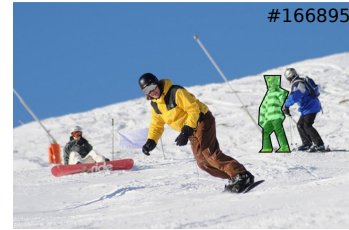

Is it a person? **Yes**  
 One in yellow? **No**  
 One with white pants? **No**  
 One with blue pants in the top? **No**

Figure 12: Same picture but different objects.

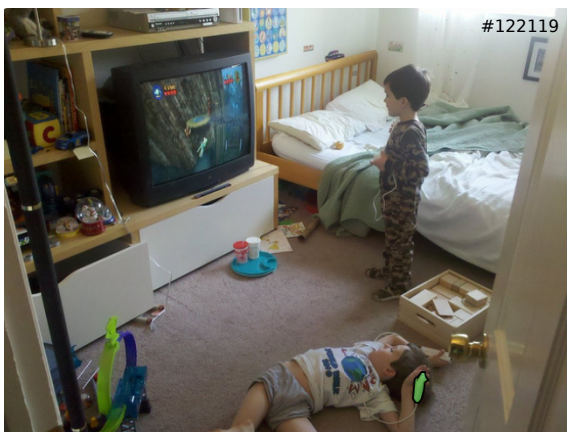

Is it a person? **No**  
 Is it on the shelves? **No**  
 Is it on the floor? **Yes**  
 Is it a cup? **No**  
 Is it blue? **No**  
 Is it wood? **No**  
 Is it the bed? **No**  
 Is it in the lower half of the image? **Yes**  
 Is it in the lower left corner? **No**  
 Is it near the blue tray with two cups? **No**  
 Is it near the green and blue toy? **No**  
 Is it near the boy laying on the floor? **Yes**  
 Is it something he is touching? **Yes**  
 Is it the remote? **Yes**  
 Is it the one in his right hand (close to the wooden box)? **No**

Figure 13: A long dialogue example in a very rich environment.



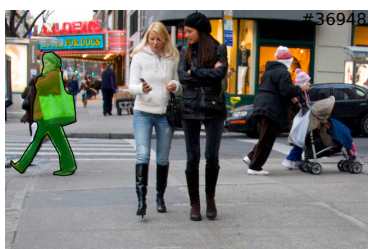

#### ReferIt

woman in red jacket with green bag  
left woman in red coat

#### GuessWhat?!

Is it a person? **Yes**  
One of the people with the stroller on the right? **No**  
One of the two people crossing the street towards us? **No**  
The woman in red? **Yes**

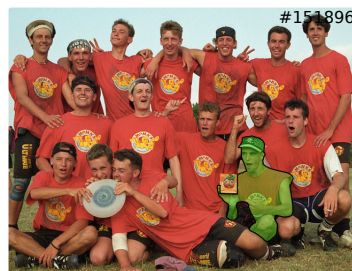

#### ReferIt

guy with hat bottom right front  
guy sitting with hat bottom right

#### GuessWhat?!

Is it a person? **Yes**  
Are they standing? **No**  
Are they touching the frisbee? **No**  
Are they holding a square thing? **Yes**  
Black cap ? **Yes**

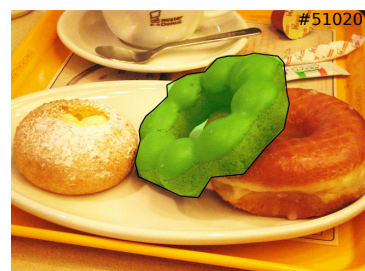

#### ReferIt

doughnut in the middle with green frosting

#### GuessWhat?!

Is it edible? **Yes**  
Is it on oval plate? **Yes**  
Is it green? **Yes**  
The whole doughnut? **Yes**

Figure 14: Samples illustrating the difference between GuessWhat?! and ReferIt games. As both dataset are constructed on top of MS COCO, we picked identical objects (and images).

### C. Additional database statistics

Figure 15 presents a word co-occurrence matrix of the GuessWhat?! dataset. Figure 16 and Figure 17a compares the object size and category distribution of GuessWhat?! with MS Coco.

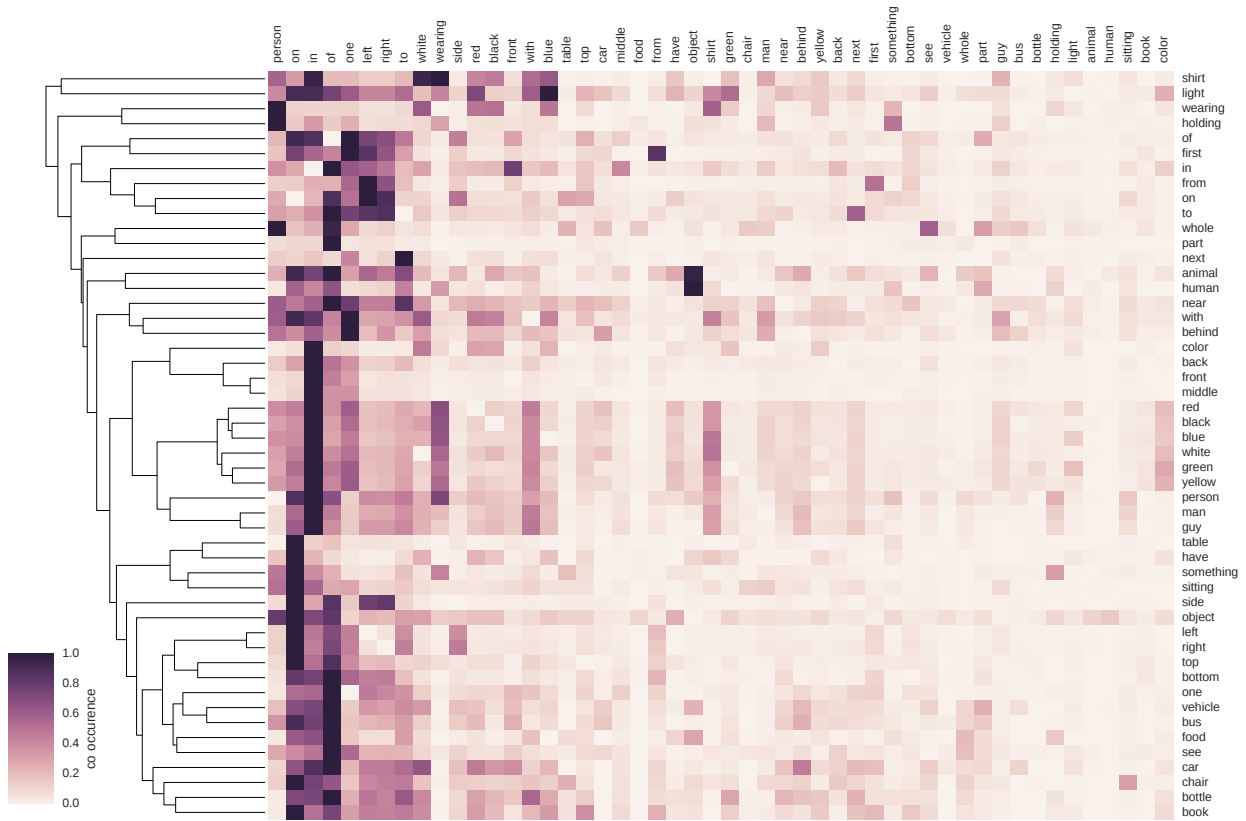

Figure 15: Co-occurrence matrix of words. Only the 50 most frequent words are kept. Rows are first normalized before being sorted thanks a hierarchical clustering with an euclidean distance.

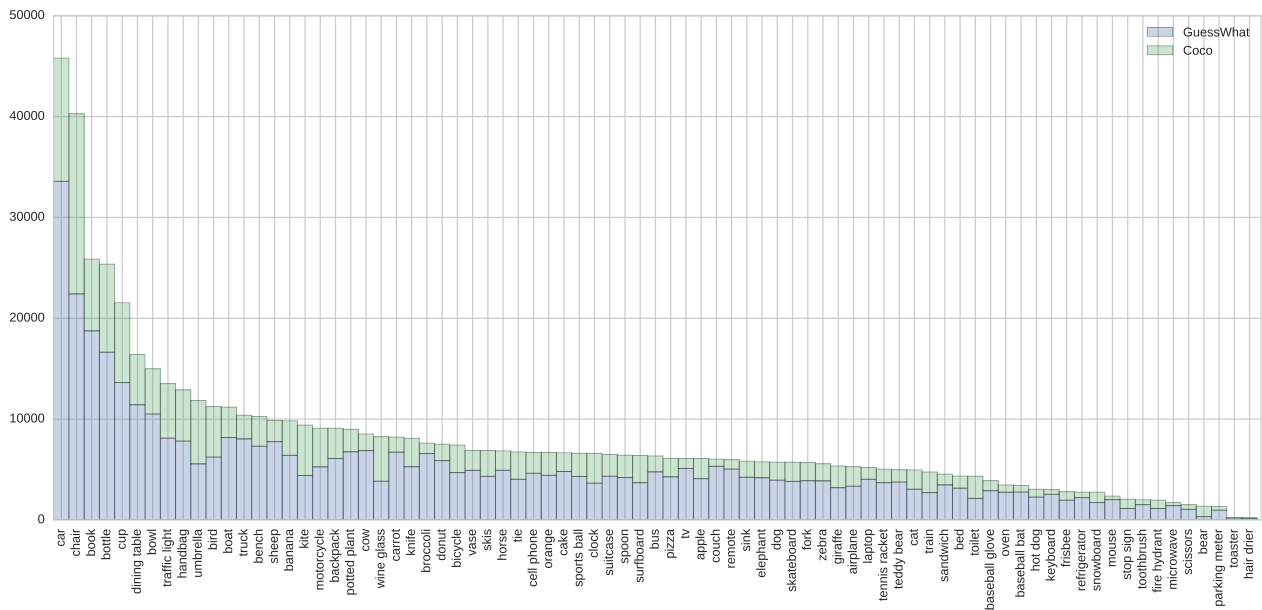

Figure 16: Visualization of the object category distribution of MS COCO and GuessWhat?! dataset. The person category was removed for clarity (resp. 273469 and 188204).

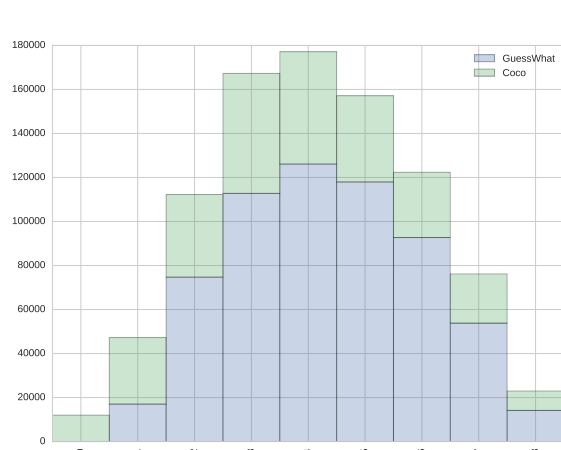

(a)

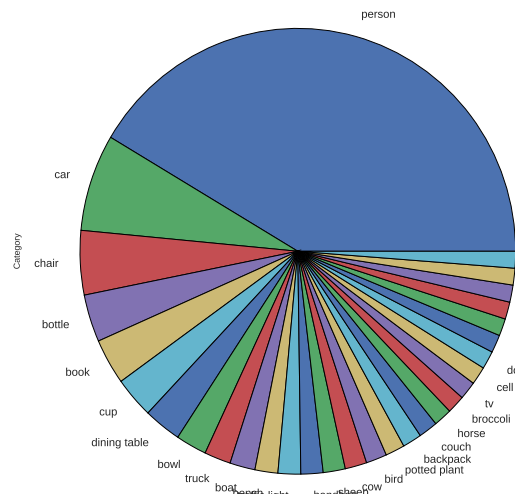

(b)

Figure 17: (a) Visualization of the object size distribution of MS COCO and GuessWhat?! dataset. (b) Distribution of the the 30 (out of 80) prominent object categories in the GuessWhat?! which represent 71.3% of the objects.

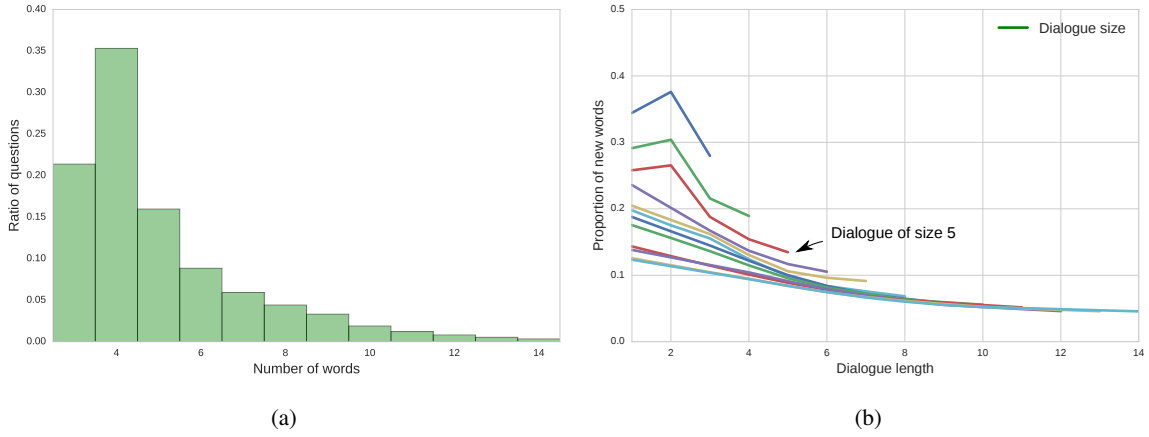

Figure 18: (a) Number of words per question. The question length follows a Poisson-like distribution, a finding which is in line with other datasets [6]. (b) Percentage of apparition of new words along a dialogues. Questioner tends keep using the same words during the dialogues.

| Topic 1        | Topic 2           |
|----------------|-------------------|
| Abstract words | Descriptive words |
| person         | left              |
| food           | one               |
| vehicle        | right             |
| human          | wearing           |
| car            | side              |
| one            | white             |
| object         | red               |
| animal         | table             |

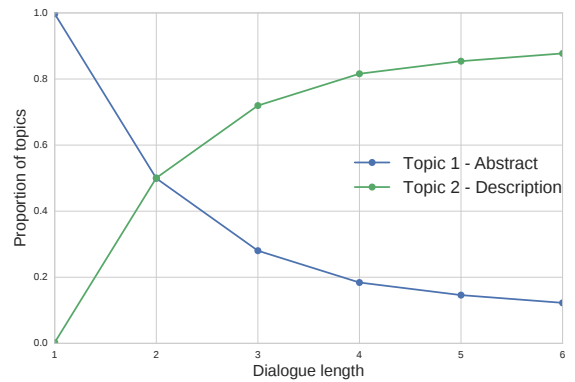

Figure 19: Relative evolution of topics during a dialogue of size 6. We applied Data Topic Models (DTM) [8] with the python framework [32] on our dataset. The table reports the two prominent detected topics with their respective key words while the figure display their relative evolution during the dialogue. The topic titles are manually picked.



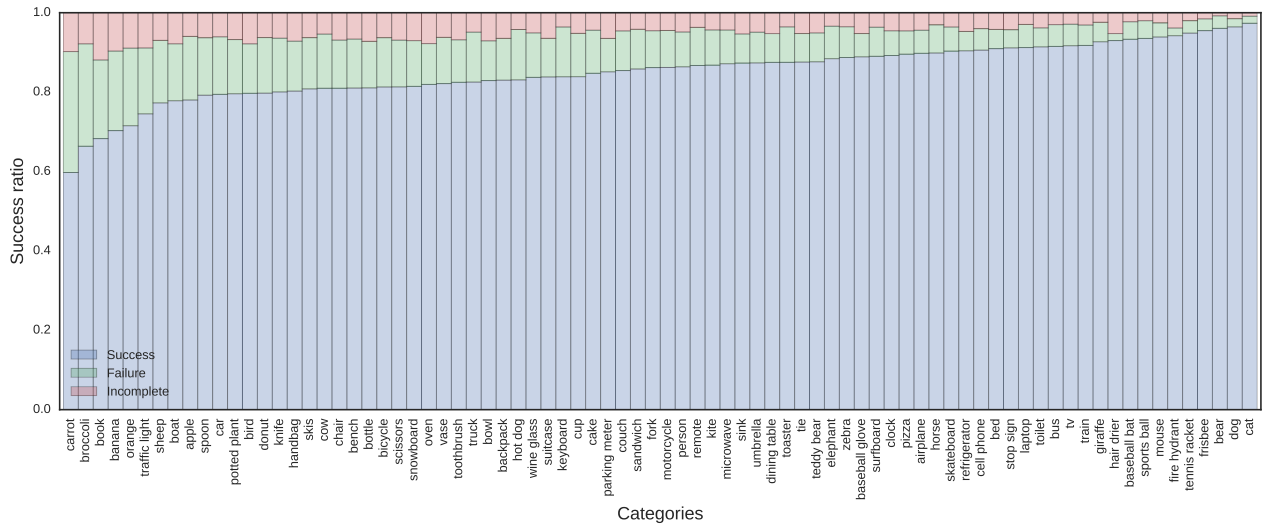

Figure 20: Histogram of success ratio broken down per object category.

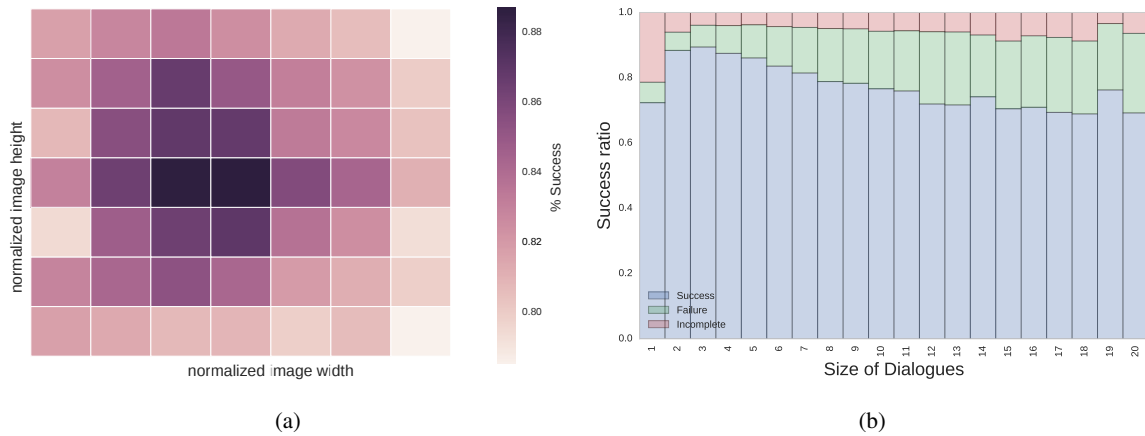

Figure 21: (a) Heatmap of the success ratio with respect to the spatial location within the picture. (b) Histogram of the success ratio relative to the dialogue length.

|         |       |         |      |     |         |      |     |
|---------|-------|---------|------|-----|---------|------|-----|
| person  | 14.48 | person  | 3.20 | =   | left    | 2.95 | ↗   |
| food    | 1.29  | left    | 1.69 | ↗   | right   | 2.32 | ↗   |
| animal  | 1.16  | wearing | 1.20 | new | person  | 2.28 | ↗   |
| human   | 1.03  | right   | 1.02 | new | wearing | 1.66 | ↗   |
| object  | 0.77  | front   | 0.97 | new | whole   | 1.58 | new |
| car     | 0.60  | white   | 0.91 | new | white   | 1.56 | =   |
| vehicle | 0.57  | red     | 0.77 | new | red     | 1.26 | =   |
| cat     | 0.41  | car     | 0.64 | ↗   | black   | 1.19 | ↗   |
| alive   | 0.37  | black   | 0.60 | new | front   | 1.14 | ↗   |
| dog     | 0.35  | blue    | 0.59 | new | blue    | 1.10 | =   |

(a) Dialogues having 3 questions

|           |      |         |      |     |         |      |   |         |      |     |
|-----------|------|---------|------|-----|---------|------|---|---------|------|-----|
| person    | 8.20 | person  | 1.98 | =   | left    | 1.92 | = | left    | 2.13 | =   |
| food      | 1.03 | left    | 1.03 | ↗   | right   | 1.77 | ↗ | right   | 2.04 | =   |
| human     | 0.56 | right   | 0.66 | new | person  | 1.20 | ↗ | white   | 1.28 | ↗   |
| animal    | 0.46 | front   | 0.59 | new | white   | 1.12 | = | person  | 1.26 | ↗   |
| vehicle   | 0.45 | car     | 0.51 | ↗   | wearing | 0.93 | = | black   | 0.90 | ↗   |
| object    | 0.42 | white   | 0.48 | new | black   | 0.79 | ↗ | wearing | 0.85 | ↗   |
| car       | 0.36 | wearing | 0.48 | new | side    | 0.67 | ↗ | red     | 0.80 | =   |
| furniture | 0.24 | side    | 0.43 | new | front   | 0.72 | = | whole   | 0.80 | new |
| left      | 0.24 | red     | 0.39 | new | black   | 0.69 | ↗ | blue    | 0.75 | =   |
| edible    | 0.20 | vehicle | 0.39 | ↗   | blue    | 0.65 | ↗ | front   | 0.73 | =   |

(b) Dialogues having 5 questions

|           |      |           |      |     |         |      |   |         |      |   |         |      |     |
|-----------|------|-----------|------|-----|---------|------|---|---------|------|---|---------|------|-----|
| person    | 5.89 | person    | 1.44 | =   | left    | 1.26 | = | left    | 1.42 | = | left    | 1.65 | =   |
| food      | 0.74 | left      | 0.73 | ↗   | right   | 1.08 | ↗ | right   | 1.39 | = | right   | 1.54 | =   |
| human     | 0.38 | right     | 0.42 | new | person  | 0.82 | ↗ | white   | 0.88 | = | white   | 0.96 | =   |
| vehicle   | 0.30 | table     | 0.37 | ↗   | side    | 0.67 | ↗ | person  | 0.84 | = | person  | 0.90 | =   |
| object    | 0.28 | front     | 0.36 | new | side    | 0.60 | ↗ | black   | 0.63 | ↗ | red     | 0.65 | ↗   |
| car       | 0.26 | food      | 0.35 | ↗   | wearing | 0.54 | = | red     | 0.57 | ↗ | black   | 0.63 | ↗   |
| animal    | 0.26 | side      | 0.35 | new | red     | 0.49 | = | wearing | 0.56 | ↗ | blue    | 0.57 | ↗   |
| furniture | 0.20 | car       | 0.31 | ↗   | table   | 0.41 | = | blue    | 0.54 | ↗ | wearing | 0.52 | ↗   |
| left      | 0.14 | wearing   | 0.28 | new | front   | 0.38 | ↗ | side    | 0.53 | ↗ | next    | 0.51 | new |
| boat      | 0.14 | something | 0.28 | new | car     | 0.37 | ↗ | front   | 0.45 | = | side    | 0.51 | ↗   |

(c) Dialogues having 7 questions

Table 5: Proportions of the ten most common words for each depth of questions for sorted by the size of the dialogues

## D. All oracle baselines

| Model                                        | Train err | Valid err | Test err     |
|----------------------------------------------|-----------|-----------|--------------|
| Dominant class (no)                          | 47.4%     | 46.2%     | 50.9%        |
| Category                                     | 43.0%     | 42.8%     | 43.1%        |
| Question                                     | 40.2%     | 41.7%     | 41.2%        |
| Crop                                         | 40.9%     | 42.7%     | 43.0%        |
| Image                                        | 45.7%     | 46.7%     | 46.7%        |
| Spatial                                      | 43.9%     | 44.1%     | 44.3%        |
| Category + Spatial                           | 41.6%     | 41.7%     | 42.1%        |
| Question + Crop                              | 22.3%     | 29.1%     | 29.2%        |
| Question + Image                             | 37.9%     | 40.2%     | 39.8%        |
| Question + Category                          | 23.1%     | 25.8%     | 25.7%        |
| Question + Spatial                           | 28.0%     | 31.2%     | 31.3%        |
| Spatial + Crop                               | 41.8%     | 42.4%     | 42.8%        |
| Crop + Image                                 | 41.6%     | 42.1%     | 42.4%        |
| Spatial + Image                              | 42.2%     | 44.1%     | 44.2%        |
| Category + Crop                              | 41.0%     | 41.7%     | 42.3%        |
| Category + Image                             | 42.3%     | 42.7%     | 43.0%        |
| Category + Crop + Image                      | 40.6%     | 41.5%     | 41.8%        |
| Category + Spatial + Crop                    | 40.6%     | 41.6%     | 42.1%        |
| Question + Category + Spatial                | 17.2%     | 21.1%     | <b>21.5%</b> |
| Question + Crop + Image                      | 23.7%     | 29.9%     | 30.0%        |
| Category + Spatial + Image                   | 40.4%     | 42.0%     | 42.2%        |
| Question + Category + Image                  | 23.4%     | 27.1%     | 27.4%        |
| Question + Spatial + Image                   | 28.4%     | 32.5%     | 32.5%        |
| Spatial + Crop + Image                       | 41.6%     | 42.1%     | 42.5%        |
| Question + Category + Crop                   | 20.4%     | 24.4%     | 24.7%        |
| Question + Spatial + Crop                    | 19.4%     | 26.0%     | 26.2%        |
| Question + Category + Spatial + Crop         | 16.1%     | 21.7%     | 22.1%        |
| Question + Spatial + Crop + Image            | 20.7%     | 27.7%     | 27.9%        |
| Category + Spatial + Crop + Image            | 40.3%     | 41.4%     | 41.8%        |
| Question + Category + Spatial + Image        | 19.2%     | 23.2%     | 23.5%        |
| Question + Category + Crop + Image           | 20.0%     | 25.3%     | 25.5%        |
| Question + Category + Spatial + Crop + Image | 17.8%     | 23.2%     | 23.3%        |

Table 6: Classification errors for all oracle baselines.

E. Guesser generation model

|                                                                                    | Generated                    |     | Groundtruth              |     |
|------------------------------------------------------------------------------------|------------------------------|-----|--------------------------|-----|
|   | Is it a person?              | No  | Is it in the sky?        | No  |
|                                                                                    | Is it the kite?              | No  | Is it the umbrella?      | No  |
|                                                                                    | Is it the kite?              | No  | Is it the ocean?         | No  |
|                                                                                    | Is it the chair?             | No  | Is it the boat?          | Yes |
|                                                                                    | Is it the boat?              | Yes |                          |     |
|   | Is it a person?              | No  | Is it an object?         | Yes |
|                                                                                    | Is it a skateboard?          | No  | Do you wear it?          | No  |
|                                                                                    | Is it a car?                 | Yes | Do you ride it?          | No  |
|                                                                                    | Is it the one on the right?  | No  | Is it metal?             | Yes |
|                                                                                    | Is it the one on the right?  | No  |                          |     |
|  | Is it a person?              | Yes | Is it a person?          | Yes |
|                                                                                    | Is it the one in the front?  | No  | Is he in the foreground? | No  |
|                                                                                    | Is it the one in the middle? | Yes | Is he wearing blue?      | Yes |
|                                                                                    | Is it the one in the middle? | Yes |                          |     |
|                                                                                    | Is it the whole person?      | Yes |                          |     |

Figure 22: Three samples of QGen+GT model for which the correct object was predicted.



|                                                                                     | Generated                                                                                                                                                      | Groundtruth                                                                            |
|-------------------------------------------------------------------------------------|----------------------------------------------------------------------------------------------------------------------------------------------------------------|----------------------------------------------------------------------------------------|
|    | Is it the cat? No<br>Is it the cat? No<br>Is it the chair? No<br>Is it the book? No<br>Is it the book? No                                                      | Is it an animal? No<br>Is it a device? Yes<br>Is it silver in color? Yes               |
|   | Is it a person? No<br>Is it a remote? No<br>Is it the chair? Yes<br>Is it the one on the right? No<br>Is it the one next to the right? No                      | Is it a person? No<br>Is it a couch? Yes<br>Does the couch have two pillows on it? Yes |
|  | Is it a person? Yes<br>Is it the guy in the front? No<br>Is it the guy in the middle? No<br>Is it the guy in the middle? No<br>Is it the guy in the middle? No | Is it a person? Yes<br>Is it in the foreground? No<br>Is it on a screen? Yes           |

Figure 23: Three dialogue samples of QGen+GT model for which the wrong object was predicted.
